# Functional Bias and Demographic History Obscure Patterns of Selection among Single-Copy Genes in a Fungal Species Complex

Santiago Sánchez-Ramírez<sup>1,2,\*</sup>, Jean-Marc Moncalvo<sup>1,3,4</sup>

<sup>1</sup> Department of Ecology and Evolutionary Biology, University of Toronto, 25 Willcocks Street, Toronto ON, M5S 3B2, Canada

\* **Corresponding author:** E-mail: [santiago.snchez@gmail.com](mailto:santiago.snchez@gmail.com), [santiago.sanchez@mail.utoronto.ca](mailto:santiago.sanchez@mail.utoronto.ca)

<sup>2</sup> Department of Natural History, Royal Ontario Museum, 100 Queen's Park, Toronto ON, M5S 2C6, Canada

<sup>4</sup> Centre for the Analysis of Genome Evolution and Function, University of Toronto, 25 Willcocks Street, Toronto ON, M5S 3B2, Canada

Running title: Polymorphism and divergence in *Amanita*

## Abstract

Many different evolutionary processes may be responsible for explaining natural variation within genomes, some of which include natural selection at the molecular level and changes in population size. Fungi are highly adaptable organisms, and their relatively small genomes and short generation times make them pliable for evolutionary genomic studies. However, adaptation in wild populations has been relatively less documented compared to experimental or clinical studies. Here, we analyzed DNA sequences from 502 putative single-copy orthologous genes in 63 samples that represent seven

recently diverged North American *Amanita (jacksonii-complex)* lineages. For each gene and each species, we measured the genealogical sorting index (*gsi*) and infinite-site-based summary statistics, such as  $\hat{\pi}$ ,  $\hat{\theta}_w$ , and  $D_{Taj}$  in coding and intron regions. MKT-based approaches and likelihood-ratio-test  $K_n/K_s$  models were used to measure natural selection in all coding sequences. Multi-locus (Extended) Bayesian Skyline Plots (eBSP) were used to model intraspecific demographic changes through time based on unlinked, putative neutral regions (introns). Most genes show evidence of long-term purifying selection, likely reflecting a functional bias implicit in single-copy genes. We find that two species have strongly negatively skewed Tajima's  $D$ , while three other have a positive skew, corresponding well with patterns of demographic expansion and contraction. Standard MKT analyses resulted in a high incidence of near-zero  $\alpha$  with a tendency towards negative values. In contrast,  $\alpha$  estimates based on the distribution of fitness effects (DFE), which accounts for demographic effects and slightly deleterious mutations, suggest a higher proportion of sites fixed by positive selection. The difference was more notorious in species with expansion signatures or with historically low population sizes, evidencing the concealing effects of specific demographic histories. Finally, we attempt to mitigate Gene Ontology term overrepresentation, highlighting the potential adaptive or ecological roles of some genes under positive selection.

**Key words:** *Amanita jacksonii*, comparative population genomics, ectomycorrhizal, exon-targeted sequencing, Extended Bayesian Skyline Plot, molecular evolution

## Introduction

Understanding the nature of genomic variation can help illustrate how natural selection and demography balance out throughout the history of a species. The neutral theory of molecular evolution (Kimura 1986; Ohta 1992) postulates that most mutations contributing substantially to the

49 genetic pool of a population will be either neutral or nearly so. Behind this reasoning is the  
50 assumption that changes that alter the amino acid composition of a protein will tend to be deleterious  
51 and selected against, while those that are advantageous will be rare. In this framework, one can test  
52 whether DNA variation at a given locus fits the expectations under the neutral equilibrium model  
53 (Tajima 1989; Fu and Li 1993, 1999). These models primarily allow for explicit testing of neutrality  
54 departures, however different kinds of evolutionary processes, such as selective sweeps,  
55 recombination, and demographic changes, can mimic similar results (Bachtrog and Andolfatto 2006;  
56 Ramírez-Soriano et al. 2008). Nonetheless, selection is likely to affect specific regions through the  
57 fixation of linked neutral variation –a process known as hitchhiking or selective sweeps–, while  
58 demographic changes are more likely to have genome-wide effects (Andolfatto 2001; Nielsen 2001).  
59  
60 Natural selection at the molecular level is detectable in protein-coding DNA. This can be  
61 accomplished by looking at the relationship between functional (amino acid-changing or non-  
62 synonymous) and silent (neutral or synonymous) variation. A widely use test of selection is the  
63 McDonald-Kreitman test (MKT, McDonald and Kreitman 1991), which is based on the comparison  
64 between the ratio of functional ( $\pi_n$ ) and silent ( $\pi_s$ ) mutations within a species (polymorphism) and  
65 the ratio of fixed  $K_n$  and  $K_s$  mutations between species (divergence). If both polymorphism and  
66 divergence were solely driven by mutation and drift, one would expect their ratio to equal one. This  
67 model assumes that all  $K_s$  mutations are neutral and that  $K_n$  mutations are either strongly deleterious,  
68 neutral or strongly advantageous (Smith and Eyre-Walker 2002). In this framework, advantageous  
69 mutations are more likely to contribute to divergence due to their high fixation probability, while  
70 deleterious mutations are likely to be found at lower frequencies due to the effects of purifying  
71 selection. On the other hand, the vast majority of segregating mutations are likely to be neutral, as  
72 they will tend to persist in the population for longer periods until they eventually go to fixation by

random genetic drift (Sella et al. 2009). However, the proportion of adaptive mutations can be under- or overestimated under certain demographic scenarios combined with weak selection (Smith and Eyre-Walker 2002; Eyre-Walker 2006; Messer and Petrov 2013a). For instance, in species with reduced population sizes, slightly deleterious mutations are effectively neutral, thus they are at higher frequency in the population resulting in an underestimation of the proportion of adaptive mutations. Similarly, a recent population expansion will tend to decrease polymorphism, confounding sweep-driven positive selection (Nielsen 2001; Nielsen et al. 2005; Wright and Gaut 2005). Furthermore, another approach is to quantify selection directly as the ratio of substitution rates at  $K_n$  and  $K_s$  sites (Kimura 1977; Huges and Nei 1988; Goldman and Yang 1994). In a neutral scenario,  $K_n/K_s$  or  $\omega$  should approximate 1, with values above indicating diversifying (positive) selection, and values below indicating purifying (negative) selection (Nielsen 1997; Yang and Nielsen 2000; Nielsen 2001).

Detecting genome-wide patterns of selection and demography is now feasible through the growing availability and accessibility of whole-genome data; the field now known as population genomics (Charlesworth 2010). Most studies addressing questions such as genome-wide effects of selection have usually focus on a number of model organisms (Hough et al. 2013; Ellegren 2014), most of which have good reference genomes and well-documented annotations, while for the vast majority of species, empirical evidence is still lacking (Cutter and Payseur 2013). Nonetheless, lowering sequencing costs and more efficient bioinformatics tools are making these types of approaches accessible to non-model organisms (Ekblom and Galindo 2011; Aguilera et al. 2010).

Fungi play multiple essential roles in the environment, mainly as decomposers of organic matter, but also as pathogens, commensals, and mutualists. Not only due to their diverse ecology (Selbmann et

al. 2013), but also because of their genetic machinery (Anderson et al. 1992; Schoustra et al. 2007), fungi are regarded as highly adaptable organisms. Most evidence comes from experimental studies in yeasts (Suutari et al. 1990; Davies et al. 1995; Piper et al. 2001; Liu 2006; Dettman et al. 2007; Anderson et al. 2010; Gerstein et al. 2014), drug resistance (Kontoyiannis and Lewis 2002; Anderson 2005), and the evolution of virulence in pathogens (Bentrop and Russell 2001; Becher et al. 2010; Fisher et al. 2012). In spite of being great candidates (mostly due to relatively smaller genomes and short generation times) to study evolutionary genomics (Gladieux et al. 2014), adaptation in wild fungal populations and species has been scarcely explored. However, recent work in few fungal species has evidenced adaptive mechanisms molecularly and experimentally in the wild. For instance, in *Neurospora*, environmental factors such as temperature and latitude are contributing components of genome divergence and adaptation in wild populations (Ellison et al. 2011). Moreover, Aguilera et al. (2012) and Gladieux et al. (2013) highlight the importance of selection and molecular adaptation during host switches and host specialization in *Botrytis* and *Microbotryum*. Finally, Branco et al. (2015) explores patterns of genome divergence in two populations of the ectomycorrhizal (EM) –root-associated symbionts– fungus *Suillus* adapted coastal and montane environments. These studies are few recent examples that evidence genome-wide adaptive mechanisms in wild fungal populations.

The genus *Amanita* comprises 500-1000 species (Tulloss 2005), most of which live as EM symbionts (Wolfe et al. 2012). The Caesar’s mushrooms (sect. *Caesareae*) form a clade of edible EM *Amanita* distributed worldwide, and are particularly diverse in North America (Sánchez-Ramírez et al. 2015a). With its eight to seven species, the *A. jacksonii* complex is an example of one of two continental Plio-Pleistocene radiations, leading to variable demographic histories and geographic ranges (Sánchez-Ramírez et al. 2015b; Fig. 1). Here we sought to disentangle demographic from adaptive

processes in a multi-species comparative framework, mining a data set of 502 putative-single-copy genes produced by exon-target sequencing. We also explore functional enrichments of genes under selection and speculate about their role in adaptive and ecological processes.

## Results

### *Targets, sequence data, and bioinformatics*

Reciprocal BLAST hits between predicted proteomes in the draft genomes of *A. jacksonii* and *A. basii* identified 3,427 putative single-copy candidate genes. The total number of structural genes compared was of 8,511 in *A. jacksonii* and 5,878 in *A. basii*. From the set of 3,427, we selected genes based on a criterion of a stretch of 60 bp of conserved DNA and a minimum number of four probes per gene. Most genes exceeded the minimum number criterion by having 7 to 8 non-overlapping probes. This resulted in 3,887 probes hybridizing to 502 genes.

The total number of reads per sample ranged between 1,787,146 and 24,316,811, with a mean of 9,157,472. The percentage of on-target reads per sample ranged between 56.6% and 96.3%, with an average of 81%. The average number of on-target reads per sample varied between 3,078.6 and 45,760.5 per gene, with a mean of 14,720 across samples. All 502 genes were recovered for all 63 samples, except for samples RET 109-4 and FCME12243 where one gene was not recovered, and sample FCME5528 where two genes were not recovered.

The genes ranged in size from 1,136 to 13,720 bp, with an average length of 4,950 bp. Introns were smaller in size than exons [coding DNA (CDS)], with an average of 68.56 compared to 258.69 bp in CDS. Each gene had about 14 introns and 15 CDS on average. Eighty percent of the data corresponded to CDS, while only 20% corresponded to introns. In total, the data represented

2,483,742 nucleotide sites. We measured the amount of missing data in the alignments given that low mapping quality regions and/or regions with no coverage resulted in missing data (e.g. Ns). We find that both the amount of missing data and the number of variable sites (across all 7 species) is correlated with gene size (Supplementary Fig. S1).

# *Genealogical sorting and reciprocal monophyly*

In order to measure how well genes supported previous species delimitations (Sánchez-Ramírez et al. 2015b) and to assess the relative contribution of phylogenetic conflict (e.g. due to introgression and/or ancestral polymorphism) to polymorphism patterns, we constructed Bayesian trees and calculated the genealogical sorting index (*gsi*, Cummings et al. 2008). The *gsi* measures the degree of co-ancestry within labeled groups and cannot distinguish between introgression and ancestral polymorphism (i.e. incomplete lineage sorting). However, it provides an overall view of how consistent gene trees are with species divergences (the index goes from 1 to 0). Measures of *gsi* indicate that the vast majority of gene trees support the monophyly of at least six species, which all have median *gsi* values above 0.8 (Fig. S2 and S3 in Online Supplementary Data). In contrast, species *A. sp-jack5* and *A. sp-jack6*, delimited as distinct species in Sánchez-Ramírez et al. 2015b, had median *gsi* values between 0.6 and 0.4 suggesting some degree of phylogenomic conflict between them. When considered as a single unit the *gsi* value increased to 0.82 (Fig. S3 in Online Supplementary Data). For this reason, data from *A. sp-jack5* and *A. sp-jack6* were hereafter regarded as *A. sp-jack5/6* and considered in the following analyses as a single species.

# *DNA polymorphism*

The highest  $\hat{\pi}_s$  was found in *A. sp-F11* with a mean of 0.0119, while the lowest mean, 0.0029, was found in *A. sp-jack3* –a 3 order magnitude difference (Table 1). As expected due to selective

169 constrain,  $\hat{\pi}_n$  was lower in comparison with mean values ranging from 0.0005 in *A. sp-jack3* to  
 170 0.0013 in *A. sp-F11* and *A. sp-jack5/6* (Table 1). The mean  $\hat{\theta}_s$  ranged from 0.0098 in *A. sp-jack5/6* to  
 171 0.0027 in *A. sp-jack3*, while the mean  $\hat{\theta}_n$  ranged from 0.0012 in *A. jacksonii* to 0.0005 in *A. sp-jack3*  
 172 (Table 1). On average, higher polymorphism was observed in synonymous sites compared to intronic  
 173 sites (Table 1). We find that on average, two species (*A. jacksonii* and *A. sp-jack5/6*) had a negatively  
 174 skewed Tajima's  $D$  ( $D$ ), in particular *A. jacksonii*; two other species (*A. sp-jack2* and *A. sp-jack3*) had  
 175 average  $D$  values close to 0; and three other (*A. sp-jack1*, *A. sp-T31*, and *A. sp-F11*) had positively  
 176 skewed  $D_{Taj}$  values (Fig. 2a).  $D_n$  was on average lower than  $D_s$ . In contrast, Fu and Way's  $H$  (Fu and  
 177 Way 2000), which measures the skewness of the derived (polarized by our group) site-frequency  
 178 spectrum (SFS), was lower in synonymous sites than in non-synonymous sites (Table 1). Due to  
 179 potential bias in frequency-based estimators of polymorphism, such as Tajima's  $D$ , caused by  
 180 ancestral polymorphism and/or gene flow (Städler et al. 2009; Cutter and Choi 2010; Cutter et al.  
 181 2012), we looked at the relationship between  $gsi$  values and  $D$ . With the expectation that a strong  
 182 effect would show a linear relationship between low  $gsi$  values and  $D$ , we found that genes with  
 183 significant amounts of within-species phylogenetic conflict do not skew estimates compared to those  
 184 that fully support monophyly within species ( $gsi = 1$ ; Fig. S4 Online Supplementary Data).

## 185 186 *Divergence and rates of adaptive evolution*

187 Divergence ( $K$ ) consistently varied between species in the order of 10% for synonymous sites and 2%  
 188 for non-synonymous sites (Table 1). The ratios between  $\hat{\pi}_n$  and  $\hat{\pi}_s$  ( $\hat{\pi}_n/\hat{\pi}_s$ ) and  $K_n$  and  $K_s$  ( $K_n/K_s$ )  
 189 were quite close to each other, both within and between species (Fig. 2b). This resulted in neutrality  
 190 index (NI) values that ranged on average from 0.977 in *A. sp-F11* to 1.614 in *A. sp-jack3*, and  $\alpha$   
 191 values close to zero with a tendency of negative values (Fig. 2c). Negative  $\alpha$  values can be caused



**Table 1. Polymorphism, divergence, and codon usage bias estimations for 502 genes in the *A. jacksonii* complex. N, sample size;  $S$ , segregating sites;  $\pi$ , nucleotide diversity;  $\theta$ , Watterson's theta;  $H$ , Fay and Wu's  $H$ ; NI, neutrality index; CAI, codon adaptation index. Sub-indices 'n', 's', and 'int' represent non-synonymous, synonymous, and intronic sites.**

|                      | <i>A. jacksonii</i>         | <i>A. sp-jack56</i>         | <i>A. sp-jack2</i>          | <i>A. sp-jack3</i>          | <i>A. sp-jack1</i>         | <i>A. sp-T31</i>            | <i>A. sp-F11</i>            |
|----------------------|-----------------------------|-----------------------------|-----------------------------|-----------------------------|----------------------------|-----------------------------|-----------------------------|
| N                    | 44                          | 26                          | 18                          | 14                          | 8                          | 8                           | 8                           |
| $S_n$                | 16 (3–39)                   | 17 (4–39)                   | 12 (1–29)                   | 5 (0–14)                    | 5 (0–12)                   | 4 (0–11)                    | 9 (1–23)                    |
| $S_s$                | 25 (6–62)                   | 29 (12–52)                  | 22 (5–52)                   | 7 (1–20)                    | 8 (1–18)                   | 7 (1–18)                    | 19 (4–42)                   |
| $S_{int}$            | 17 (2–48)                   | 19 (3–45)                   | 15 (1–41)                   | 5 (0–15)                    | 5 (0–15)                   | 5 (0–14)                    | 13 (1–35)                   |
| $\hat{\pi}_n$        | 0.0008<br>(0.0001–0.0021)   | 0.0013<br>(0–0.0025)        | 0.001<br>(0–0.0024)         | 0.0005<br>(0.0002–0.0013)   | 0.0007<br>(0.0002–0.0015)  | 0.0006<br>(0.0003–0.0017)   | 0.0013<br>(0.0001–0.0032)   |
| $\hat{\pi}_s$        | 0.0059<br>(0.0013–0.0157)   | 0.0088<br>(0.0041–0.0154)   | 0.0081<br>(0.0021–0.0172)   | 0.0029<br>(0.0003–0.0077)   | 0.0051<br>(0.0012–0.011)   | 0.0047<br>(0.0007–0.0109)   | 0.0119<br>(0.0034–0.0232)   |
| $\hat{\pi}_{int}$    | 0.0034<br>(0.0005–0.0097)   | 0.0049<br>(0.0017–0.0099)   | 0.0048<br>(0.0006–0.0121)   | 0.0018<br>(0–0.0055)        | 0.0028<br>(0–0.0077)       | 0.0027<br>(0–0.0074)        | 0.0067<br>(0.0014–0.0148)   |
| $\hat{\theta}_n$     | 0.0012<br>(0.0003–0.0027)   | 0.0015<br>(0.0005–0.0029)   | 0.0011<br>(0.0002–0.0023)   | 0.0005<br>(0–0.0012)        | 0.0006<br>(0–0.0013)       | 0.0005<br>(0–0.0013)        | 0.0011<br>(0.0002–0.0026)   |
| $\hat{\theta}_s$     | 0.0073<br>(0.0022–0.0166)   | 0.0098<br>(0.0049–0.0166)   | 0.0079<br>(0.0023–0.0161)   | 0.0027<br>(0.0003–0.0067)   | 0.0044<br>(0.001–0.0094)   | 0.0038<br>(0.0006–0.0087)   | 0.0096<br>(0.0029–0.019)    |
| $\hat{\theta}_{int}$ | 0.0042<br>(0.0009–0.0106)   | 0.0054<br>(0.0021–0.0099)   | 0.0046<br>(0.0008–0.0111)   | 0.0016<br>(0–0.0044)        | 0.0024<br>(0–0.0065)       | 0.0022<br>(0–0.006)         | 0.0054<br>(0.0012–0.0118)   |
| $H_n$                | -0.1198<br>(-0.6092–0.1929) | -0.0635<br>(-0.2935–0.1128) | -0.0274<br>(-0.1759–0.1143) | -0.0589<br>(-0.3115–0.9992) | 0.0137<br>(-0.1256–1.2172) | -0.0114<br>(-0.2371–1.2172) | 0.0246<br>(-0.078–0.5348)   |
| $H_s$                | -2.2802<br>(-5.4425–1.1004) | -0.1197<br>(-0.3405–0.0735) | -0.0444<br>(-0.1897–0.0858) | -0.1074<br>(-0.2942–0.9992) | 0.0006<br>(-0.131–0.0789)  | -0.02<br>(-0.1177–0.0774)   | -0.0163<br>(-0.0539–0.0326) |
| $K_n$                | 0.0215<br>(0.0077–0.0415)   | 0.0203<br>(0.007–0.0404)    | 0.0216<br>(0.0079–0.04)     | 0.0221<br>(0.0081–0.0404)   | 0.0201<br>(0.0076–0.0378)  | 0.0213<br>(0.008–0.039)     | 0.0214<br>(0.0082–0.0402)   |
| $K_s$                | 0.1394<br>(0.0884–0.1876)   | 0.1369<br>(0.0892–0.1887)   | 0.1439<br>(0.0927–0.1878)   | 0.1533<br>(0.103–0.2056)    | 0.1508<br>(0.1011–0.2037)  | 0.1624<br>(0.1075–0.2168)   | 0.1541<br>(0.1009–0.203)    |
| NI                   | 1.1798<br>(0.3653–2.6753)   | 1.185<br>(0.4161–2.2767)    | 1.0788<br>(0.2228–2.6991)   | 1.614<br>(0–4.6016)         | 1.3401<br>(0–3.9734)       | 1.271<br>(0–3.5996)         | 0.9777<br>(0.2139–2.2241)   |
| CAI                  | 0.419<br>(0.2787–0.5453)    | 0.4167<br>(0.2794–0.5331)   | 0.4138<br>(0.2725–0.5288)   | 0.4045<br>(0.2619–0.5255)   | 0.3973<br>(0.2674–0.5242)  | 0.3991<br>(0.2577–0.5174)   | 0.4105<br>(0.2641–0.5274)   |

196 by strong purifying selection, resulting in  $\hat{\pi}_n/\hat{\pi}_s > K_n/K_s$  as deleterious variant will not contribute to  
 197 divergence, but will be found at lower frequencies as polymorphism (Nielsen 2001; Egea et al. 2008).  
 198 To explore this possibility, we performed likelihood-ratio-test (LRT) of codon-based substitution  
 199 models (Yang and Nielsen 2002) between species and found that most genes (278, 55%) fitted a  
 200 model that supports purifying selection (the nearly-neutral model, M1a, with parameters  $\omega = 1$  and  
 201  $\omega < 1$ ), while only 10% (48) were supported by a diversifying selection model (the positive selection  
 202 model, M2a, with parameters  $\omega = 1$ ,  $\omega < 1$ , and  $\omega > 1$ ). For genes fitting the nearly-neutral and  
 203 diversifying selection models, the mean  $\omega$  across sites was  $0.23 \pm 0.09$  and  $0.27 \pm 0.12$ , respectively.  
 204 The rest (176, 35%) did not significantly (0.05 significance level) fit either model, so were deemed to  
 205 be under stronger purifying selection, given that  $\omega \ll 1$  (mean  $\omega$   $0.18 \pm 0.1$ ). Moreover, genes with  
 206 longer than expected coalescence times (i.e. ancestral polymorphism or introgression) can also lead  
 207 to a  $\hat{\pi}_n/\hat{\pi}_s > K_n/K_s$  effect by increasing the frequency of weakly deleterious variants, or variants  
 208 under balancing selection (Charlesworth 2009), causing negative  $\alpha$  values. However, we find no  
 209 relationship between  $gsi$  and  $\alpha$  (Fig. S5 Online Supplementary Data). A third possibility is that weak  
 210 selection at synonymous coding (e.g. codon usage bias) is reducing synonymous relative to non-  
 211 synonymous diversity, however we find no such pattern (Table 1 and Fig. S6 Online Supplementary  
 212 Data).  
 213  
 214 The MKT is susceptible to violations of the standard neutral model. In particular, demographic  
 215 change and the segregation of slightly deleterious mutations can bias  $\alpha$  estimates unworldly or  
 216 downwardly (Eyre-Walker 2006; Messer and Petrov 2013a). One way that we accounted for this bias  
 217 was by excluding low-frequency variants in the standard MKT. The other way was by calculating  $\alpha$   
 218 and  $\omega$  using the distribution of fitness effects (DFE:  $\alpha_{dfe}$  and  $\omega_\alpha$ ) (Eyre-Walker and Keightley 2007,

2009). Notably, the proportion of adaptive fixations,  $\alpha_{dfe}$ , resulted in higher estimations based on the standard MKT test (Fig 3A). We also note higher between species variation, both with respect to  $\alpha_{dfe}$  and  $\omega_{\alpha}$  (Fig. 3). Mean  $\alpha_{dfe}$  values ranged from 63% in *A. jacksonii* to 11% in *A. sp-jack1* (Fig. 3A). Given that results based on the DFE indicate an underestimation of  $\alpha$ , it would be conservative to consider genes with  $\alpha > 0$  under positive selection. The number of genes with at least one adaptive mutation per 1,000 bp (i.e.  $\alpha > 0.1\%$ ) were 286 in *A. sp-F11*, 280 in *A. sp-jack2*, 240 in *A. jacksonii*, 216 in *A. sp-jack5/6*, 213 in *A. sp-jack1*, 203 in *A. sp-T31*, and 151 in *A. sp-jack3*. Besides  $\alpha_{dfe}$  and  $\omega_{\alpha}$ , the DFE can also be used to estimate the proportions of deleterious mutations under different selection strengths (scaled by the effective population size,  $N_e s$ ). The DFE estimates up to four different categories, namely  $N_e s < 1$ ,  $1 < N_e s < 10$ ,  $10 < N_e s < 100$ , and  $N_e s > 100$ . Most species had a higher proportion of mutations with very strong effects (Fig. 4; e.g.  $N_e s > 100$ ), with proportions between 0.4 and 0.8 (except *A. sp-T31*, which had a median lower than 0.4). *Amanita jacksonii* and *A. sp-T31* had the highest proportion of mutations with intermediate effects ( $10 < N_e s < 100$ ), while categories with  $N_e s < 10$  had proportions of less than 0.2 for all species (Fig. 4).

### 235 *Historical population sizes*

236 We inferred the demographic history of each species using extended Bayesian skyline model (eBSP, Heled and Drummond 2008) implemented in BEAST v1.8.2 (Drummond et al. 2012). We opted for reducing our data set in demographic history estimation for several reasons: (1) it has been shown that 16 informative genes or more should be sufficient to estimate accurate population size histories (Heled and Drummond 2008); (2) some of the genes we sampled are contiguous and possibly linked, biasing the assumption of free recombination between loci; and (3) to improve Bayesian parameter mixing and convergence times, which increases with more data (Suchard and Rambaut 2009).

243

244 The eBSP analyses supported at least one demographic change within the 95% posterior density  
245 distribution (PDD) in all seven species. The species with the highest mean number of demographic  
246 changes was *A. sp-F11* with 1.37 [1, 2 95% PDD], while the lowest was in *A. sp-jack1* with 0.3 [0, 1  
247 95% PDD]. Demographic trends of population size expansions were observed in *A. jacksonii*, *A. sp-*  
248 *jack5/6*, *A. sp-jack2*, and *A. sp-F11*, and to some extent in *A. sp-T31*, while *A. sp-jack3* and *A. sp-*  
249 *jack1* had a rather constant demographic trend (Fig. 5). The most abrupt demographic expansions  
250 were found in *A. jacksonii* and *A. sp-jack5/6* with a near 6 to 7-fold increase in population size within  
251 the last ca. 2 Myr (Fig. 5). Similar estimates were found in the two-phase demographic model in the  
252 DFE analysis.

253

# 254 *Gene Ontology*

255 Due to functional constrain, single-copy genes typically fall within specific functional groups, for  
256 instance, in binding and catalytic activities (Aguileta et al. 2008; Han et al. 2014). We find a similar  
257 functional bias (Fig. 6A), where a large proportion included proteins involved with energetic and  
258 metabolic processes (ATP binding, GO:0005524) and protein-protein interactions (protein binding,  
259 GO:0005515, Fig. 6). To less extent proteins related directly or indirectly with gene expression  
260 regulation (i.e. nucleotide [GO:0000166], nucleic acid [GO:0003676], and DNA [GO:0003677]  
261 binding; zinc ion binding [GO:0008270]; regulation of transcription, DNA-dependent  
262 [GO:0006355]), transport and signaling (i.e. protein phosphorylation [GO:0006468], phosphorylation  
263 [GO:0016310], protein kinase activity [GO:0004672, GO:0004712], trans-membrane transport  
264 [GO:0055085], protein transport [GO:0015031]), metabolic processes (i.e. oxidation-reduction  
265 processes [GO:0055114], oxidoreductase activity [GO:0016491], carbohydrate metabolic process  
266 [GO:0005975], hydrolase activity [GO:0016787]), and homeostasis (calcium ion binding

[GO:0005509]) were also found in the mix. Nonetheless, we accounted for overrepresented Gene Ontology (GO) terms by adding up the positive selection signal (e.g.  $\alpha$  and the proportion of sites with  $\omega > 1$ ) across genes and species and then scaling by the total number of unique GO terms (see Materials and Methods). Some of the GO terms found in genes under strong directional selection included proteins related to transcription activities, cellular transport, and metabolic activities (Fig. 6B). Interestingly, GO term composition of genes under diversifying selection varied from that of genes under directional selection (e.g.  $\alpha > 0$ ), finding stronger selection in proteins with functions related to biosynthetic and other metabolic processes (Fig. 6b). From the 474 genes across all species were found with  $\alpha > 0$ , 17 were found exclusively in *A. sp-F11*, followed by 10 in *A. sp-T31* and *sp-jack5/6*, 8 in *A. jacksonii* and *A. sp-jack2*, 7 in *A. sp-jack1*, 6 in *A. sp-jack5/6*. Information about their GO and annotation can be found in Table S1 Online Supplementary Data.

## Discussion

Interpreting DNA variation from an evolutionary perspective has been a long-standing goal for population geneticists, both doing empirical and theoretical work. The neutral equilibrium theory of molecular evolution (Kimura 1977, 1986) provides a null framework to test hypotheses about natural selection and other processes acting on the genome. While the core of population genomic research has developed around coalescent-based theory in a single –or at least a pair– of species (Hough et al. 2013; Charlesworth 2010), there are clear benefits in integrating comparative and phylogenetic data, in multi-species multi-locus assessments (Cutter 2013).

### *The exon-targeted sequence-capture approach*

Before and early into the “whole-genome sequencing” era, most population genomics studies relied on PCR and Sanger sequencing of individual genes for data production. Some classic studies

included data ranging from tens to few hundreds of genes, in what were then called “whole-genome” approaches. Exon-targeted sequencing takes advantage of the rapid and massive data production of next-generation sequencing, while focusing on specific genes of interest. Although any class of gene can be potentially targeted, we opted for single-copy genes, attempting to avoid potential spurious DNA hybridizations with paralogues, which can bias diversity estimates. However, targeting single-copy genes has the disadvantage of characterizing genome-wide diversity based on a single “class” of genes, which may not necessarily represent a heterogeneous sample from the genome. Nonetheless, the degree of variation and distribution of the data within each species, in combination with our results, suggests that our sample of 502 genes maybe a good representation genome-wide variation. Furthermore, this method has been proven successful when DNA material is only available in low quantities (Hancock-Hanser et al. 2013), or from degraded samples (Templeton et al. 2013). All of our samples came from dried museum specimens and FTA plant saver cards (Dentinger et al. 2010), which would not reach quantity/quality standards for other popular downstream genomic applications such as whole-genome resequencing or reduced-library representation approaches (e.g. RAD-tag, GBS). In particular, reduced-library representation approaches are practical for sampling genome-wide SNPs, however the shortness of the fragments makes it impossible to conduct codon-based divergence and polymorphism assessments. Therefore, exon-targeting methods are a practical and efficient strategy for scoring many loci and complete structural genes in non-model organisms.

### *Effects of selection and demography on genomic variation*

Studies in flies (Smith and Eyre-Walker 2002; Bierne and Eyre-Walker 2004; Sella et al. 2009), plants (Slotte et al. 2010), and humans (Fay et al. 2001) have suggested that the rate of adaptive substitution can reach high proportions (20–40%), even in the presence of high levels of selective constrain or purifying selection (Williamson et al. 2014; Slotte et al. 2010). The rate of adaptive

evolution is thought to be even higher in microorganisms, such as bacteria (Charlesworth and Eyre-Walker 2006). In contrast, in these *Amanita* species,  $\alpha$  seems to be consistently underestimated (Fig. 2C). A number of different factors can explain potentially low levels of adaptive evolution. Among them, we will discuss how specific evolutionary scenarios such as purifying selection, relaxed selective constrain, and demographic history can contribute to this pattern, highlighting evidence in favor or against such factors.

Strong selective constraint is expected in protein coding DNA, largely because the majority of amino acid changing mutations are likely to be deleterious (Ohta 1992; Andolfatto 2005). One possible explanation for values of  $\alpha \sim 0$  is purifying selection. If non-synonymous substitutions are not being fixed between species, it is likely that they were deleterious early in the evolution of a lineage, and thus purged from the population (Fay and Wu 2003), typically leading to a low ratio of  $K_n/K_s$ . Both polymorphism (Table 1) and divergence (Fig. 2B) data overall support high selective constraint in the *A. jacksonii* complex. Similarly, codon LRTs indicate that 90% of the genes favor a model in which the majority of sites are under long-term purifying selection. Most species also resulted with high proportions of new (deleterious) mutations under strong selective effects (e.g.  $N_e s > 10$ ; Fig. 4). We believe that this strong signal of high purifying selection could, in part, be a reflection of a functional bias in single-copy genes (Fig. 6). Many single-copy genes are thought to be under strong selective constrain for duplication, which is also linked to functional constrain (De Smet et al. 2013). Other studies in plants and fungi have characterized single-copy genes under conserved cellular functions, such as binding and metabolism (Aguileta et al. 2008; Han et al. 2014).

Moreover, mixed genome-wide signals of positive and negative selection are not uncommon (Williamson et al. 2014; Fay et al. 2001), and our results also show evidence of positive selection.

339 While we find little support for extensive diversifying selection, as only 10% of genes supported  
340 model M2a (site class with  $\omega > 1$ ), more genes were found under directional selection within and  
341 across species. On average each species had about half the total number of genes (ca. 230 from 502)  
342 with  $\alpha > 0$ , and about 94% (474) of all 502 genes had at least one species with  $\alpha > 0$ . However,  
343 only 25 genes were found with  $\alpha > 0$  for all seven species, which is a number closer to the number  
344 of genes found under diversifying selection. The diversifying selection model requires selection in  
345 favor of allelic diversity, which may rarely happen in genes under functional constraint (Yang et al.  
346 2000). Nonetheless, molecular adaptation is possible, even when  $K_n/K_s < 1$  (Kryazhimskiy and  
347 Plotkin 2008).

348

349 The fate of adaptive and slightly deleterious mutations is highly affected by  $N_e$  (Ohta 1992; Eyre-  
350 Walker and Keightley 2007; Charlesworth 2009). Standard MKT approaches are generally  
351 insensitive to the presence of slightly deleterious mutations and/or demographic changes, which can  
352 bias  $\alpha$  estimates (Smith and Eyre-Walker 2002; Eyre-Walker and Keightley 2009; Messer and Petrov  
353 2013a). Methods such as the DFE model can both account for slightly deleterious (non-synonymous)  
354 mutations that tend to contribute more to polymorphism than to divergence, as well as demographic  
355 changes (Eyre-Walker and Keightley 2007, 2009). Our results show that  $\alpha$  (standard MKT) is largely  
356 underestimated across all species (Fig. 3). This is more apparent in species that have undergone  
357 recent population expansions (Fig. 5). Slightly deleterious polymorphisms are more likely to result in  
358 underestimation of  $\alpha$  in species with low  $N_e$  or that have undergone a population contraction (Smith  
359 and Eyre-Walker 2002; Charlesworth 2009; Eyre-Walker and Keightley 2009). We note that  
360 effectively neutral non-synonymous mutations with  $N_e s \approx 1$  are less than 20% in all species (Fig. 4),  
361 however,  $\alpha$  (standard MKT) is strongly underestimated in species with historically low  $N_e$  (Fig. 5).



362

363

364 Untangling the effects of demography and selection on patterns of polymorphism is difficult  
 365 (Andolfatto 2001). In particular, because certain demographic scenarios, such as population  
 366 expansions, can result in similar polymorphism footprints. Nevertheless, demographic events are  
 367 more likely to affect the whole genome rather than individual loci in the case of selection (Stajich and  
 368 Hahn 2005). We found marked differences in Tajima's  $D$  between species indicating different levels  
 369 of skewness in the site frequency spectrum (SFS), in particular, the negative skew found in *A.*  
 370 *jacksonii* (Fig. 2a). In this species, a previous study has evidenced an increase in population size  
 371 linked to northward population expansion (Sánchez-Ramírez et al. 2015b). Here we corroborate with  
 372 a larger genomic sample that this expansion signature (Fig. 5) is likely to be legitimate, but also note  
 373 that it may be exacerbated by the effects of positive selection (Fig. 3). Overall, specific patterns of  
 374 demographic history are consistent with Tajima's  $D$  values. For instance, species with positive  
 375 Tajima's  $D$  values tended to have more constant and smaller population sizes. In comparison, species  
 376 with negative  $D$  had expansion signatures and larger population sizes (Fig. 2A, 5). Sánchez-Ramírez  
 377 et al. (2015b) found expansion signatures in *A. sp-jack2* and *A. sp-jack5/6*, which are also supported  
 378 by our results at a higher genomic scale (Fig. 5). Similarly, we find consistent demographic scenarios  
 379 in *A. sp-jack3*, *A. sp-jack1*, and *A. sp-T31*, as reported in Sánchez-Ramírez et al. (2015b). We find  
 380 particularly interesting contrasting demographic and molecular evolution patterns in two species: *A.*  
 381 *jacksonii* and *A. sp-F11*. On one side, they have opposite site frequency skews. While *A. jacksonii*  
 382 has tendency for low and high frequency variants (a negative  $D$  and  $H$ ; Fig. 2a and Table 1), *A. sp-*  
 383 *F11* only has a tendency for intermediate frequency variants (positive  $D$ ; Fig. 2a). This alone could  
 384 be explained by differences in their demographic history (Fig. 5), where the former has suffered a  
 385 bottleneck previous to a dramatic expansion northward, while the latter has had a more stable range

and demography, with comparatively high  $N_e$  (Fig. 1 and 5). While these differences are clear, both species have the highest  $\alpha_{\text{dfe}}$  values in the complex (Fig. 3), suggesting high proportions of adaptive evolution. One possibility for this apparent contradiction is that, in *A. jacksonii*, population size expansion could have led to the fixation of slightly deleterious mutations, contributing disproportionately to divergence and overestimating  $\alpha_{\text{dfe}}$  (Eyre-Walker and Keightley 2009). Another explanation is that glacial cycles during the Pleistocene could have acted as fluctuating episodes of selection, which can lead to high levels of adaptive evolution (Huerta-Sanchez et al. 2008; Bell 2009; Gossmann et al. 2014). This group most likely diversified within the last 5 Myr (Fig. 1B; Sánchez-Ramírez et al. 2015b), during a period that is characterized by a series of abrupt temperature oscillations that have deeply affected the genetic diversity of many populations and species (Hewitt 1996, 2000, 2004; Hoffmann and Sgrò 2011)

# *Functional bias, adaptive genes, and the EM habit*

The genes that were assayed here were not selected for their specific functions. In fact, they were selected due to their single-copy nature, which facilitates bait homology and specificity in exon-targeting procedures, and lowers the rate of alignment artifacts. Nonetheless, single-copy genes are known to be functionally constrained (De Smet et al. 2013), which can introduce noise when assessing functional enrichments of genes under selection. In order to reduce the effect of overrepresentation of GO term due to this functional bias, we devised a measure to scale down the amount of selection in overrepresented genes (see Material and Methods). Differences in abundance of GO terms in the overall data set (Fig. 6A) and GO terms found in genes under selection (Fig. 6A, B), suggest that the overrepresentation was mitigated. Overall, protein functions of genes under selection seem to be divided into three general categories; those related to (1) gene transcription/expression activities, (2) signalling and transport, and (3) metabolic oxidative processes

(Fig. 6). Many of these functions coincide with divergent regions in the genome of another EM fungus (*S. brevipes*) that are also thought to be under selection (Branco et al. 2015). We also noted some functions related to carbohydrate metabolism, specifically with catalytic and hydrolytic activities (Fig. 6A, B). These may be compelling because all EM fungi depend on external carbohydrate sources that are generally supplied by their hosts (Nehls et al. 2007). Throughout the evolution of the EM symbiosis, many species have suffered from a convergent loss of decay mechanisms, while retaining moderate gene repertoires with lignocellulitic capabilities (Kohler et al. 2015). Adaptation in proteins related to carbohydrate metabolism, such as hydrolase activity, could allow for a more efficient breakdown of complex polysaccharides during periods of stress and/or low photosynthetic activity. Also worth mentioning, proteins with telomeric template reverse transcriptase activity were found under diversifying selection (Fig. 6C). Studies suggest that the dynamic nature of telomeric and subtelomeric regions are likely to contribute to rapid evolution of fungi during biotic interactions (Aguileta et al. 2009).

## Material and Methods

### *Samples and whole-genome data*

Sixty-three dried specimens, representing eight species (Sánchez-Ramírez et al. 2015b) were processed from collections made in various locations in North America, all deposited in fungal herbaria (Table S2). DNA was extracted from ca. 30-50 mg of dried fungal tissue (gill) and extracted using a modified standard CTAB/proteinase K/chorophrom:isoamyl alcohol protocol (van der Nest et al. 2014). In addition, whole-genome 454 sequences were produced by the Duke Center for Genomic and Computational Biology for a North American species outside the *A. jacksonii* complex –*A. basii*. These sequences were mapped onto the *A. jacksonii* TRTC168611 draft genome (van der

433 Nest et al. 2014), with the purpose of building a whole-genome draft assembly of an outgroup  
434 species.

435

436 Identification of single-copy orthologs, probe design, and gene selection

437 Structural genes were predicted in *A. jacksonii* and *A. basii* using AUGUSTUS v3.0.3 (Stanke et al.

438 2006). All CDS in each species were reciprocally aligned against each other using command-line

439 (standalone) BLASTn, creating two files in tabular format (-outfmt 7). Next, a custom perl script

440 (rbh.pl, available from: <https://sites.google.com/site/santiagosnchezrmirez/home/software/perl>) was

441 used to find reciprocal single-copy hits, putting each pair in a single FASTA file. Each single-copy

442 pair was aligned using MUSCLE v3.6 (Edgar 2004). Probes for target hybridization were designed

443 based on conserved (identical) CDS regions, 60bp long, across both species. Only genes with four or

444 more non-overlapping regions were chosen. Two PCR primers (5'-

445 TAATACGACTCACTATAGGG-3' and 5'-CTATAGTGTCACCTAAATC-3') were added to the 5'

446 and 3' ends of the 60bp probe target, for a total of 100bp per oligonucleotide probe.

447

448 *Sequence capture, library preparation, and sequencing*

449 Custom oligos probes were synthesized by LCScience

450 (<http://www.lcsciences.com/applications/genomics/oligomix/>) using DNA microchip technology

451 (Gao et al. 2004). The synthesized probes were then PCR amplified as needed for downstream

452 applications. Probes were later transcribed into RNA using MegaScript T7 Kit (Invitrogen, Carlsbad,

453 CA) and Biotin-dUTP to produce labeled oligos. The DNA was sheared and a standard Illumina

454 TruSeq V2 DNA library kit was prepared, multiplexing all 46 samples. Sequence captures (probe-

455 target hybridization) were performed with 200ng of library, 500ng of biotinylated probes, and

456 Streptavidin beads (Invitrogen, Dynabeads M-270, CAT65305). The capture procedure was repeated

at least twice. The details of the protocols can be found in Supplementary file 1. All target captures were directly sequenced in a single Illumina Hi-Seq 2500 lane.

# *Bioinformatics*

*Read alignments, sequence phasing, and quality control.* Sequences were de-multiplexed into individual fastQ files and each one mapped onto the targets' whole-gene sequences from *A. jacksonii* using the Burrows-Wheeler Aligner's (BWA v0.7.12) algorithm BWA-MEM (Li and Durbin 2010). The resulting SAM files were then filtered with *view* in SAMtools v0.1.19 (Li et al. 2009) for off target reads, low quality mapping ( $< 30$ ), and PCR duplicates, and converted to BAM files. The reference sequences were indexed and the BAM files sorted. We used HapCompass (Aguar and Istrail 2012), which uses a read-based graph algorithm, to generate haploid sequences from BAM and VCF files. The VCF file was produced by "piping" *mpileup*, bcftools' *view*, calling the "-cg" flags for genotype likelihood computing, and *varFilter* in vcftutils.pl, only keeping SNPs with Fred quality  $\geq 20$ . The SAM files produced by HapCompass were then converted to BAM and sorted. Consensus fastQ files were produced by "piping" *mpileup*, bcftools' *view*, and *vcf2fq* in vcftutils.pl, in a similar way as above. A custom perl script (OrderFromSamtools.pl) was used to convert fastQ files to fastA format and to produce by-gene alignments from by-sample files. A second perl script (getPhasedGenome.pl) parsed those fastA files to produce "a" and "b" allelic variants per haploid sequence. All missing data was scored as Ns, while unsorted polymorphisms were either left as IUPAC ambiguity codes or scored as Ns, depending on the analysis.

*Phylogenomics and lineage sorting.* We used MrBayes v3.2 (Ronquist et al. 2012) to generate individual gene trees based on the general time reversible (GTR) model and among-site rate heterogeneity modeled as a gamma distribution (+G). For each gene, we ran two parallel runs each

with eight Metropolis-coupled Markov Chain Monte Carlo (MC<sup>3</sup>) chains and 1 million generations. We sampled every 100<sup>th</sup> state and discarded the 10% initial states as burnin. We assessed convergence by making sure that the average standard deviation of split frequencies was  $\leq 0.01$ . Posterior trees were summarized onto a majority-rule consensus tree compatible with clades with frequencies  $\geq 0.5$ . The summary trees were imported into R using *ape* (Paradis et al. 2004) where the genealogical sorting index (*gsi*, Cummings et al. 2008) was calculated. The *gsi* measures, in a range from 0 to 1, the degree of exclusive ancestry in labeled terminal groups, where 1 signifies group monophyly. These groups can represent any type of biological association, such as species or populations.

# *Analyses*

*DNA polymorphism and divergence.* Within species all sites were bi-allelic. Coding regions were based on the annotation of *A. jacksonii* (van der Nest et al. 2014). In coding regions, sites were separated into synonymous (4-fold, 3-fold, and 2-fold degenerate sites) and nonsynonymous (0-fold degenerate sites) using the method of Nei and Gojobori (1986). Polymorphism was measured as the average number of pairwise nucleotide differences per site between any two random DNA sequences or  $\hat{\pi}$  (Nei and Li 1979; Nei 1987), or the Watterson's estimator  $\hat{\theta}_w$ , which is measured as the proportion of segregating sites  $S$  in a sequence of length  $L$  divided by the  $(n - 1)$ th harmonic mean number. Both  $\hat{\pi}$  and  $\hat{\theta}_w$  were estimated using SFS counts based on formulae in Campos et al. (2014). To measure the skewness of SFS we calculated Tajima's  $D$  (Tajima 1989) and Fay and Wu's  $H$ , which measures skewness in the derived frequency spectra following Zeng et al. (2006). We measure codon usage bias by calculating the codon adaptation index (CAI, Sharp and Li 1987). Divergence  $K$  was measured as the Kimura-2-parameter (Kimura 1980) proportion of sites fixed in the ingroup compared to the outgroup (*A. basii*), considering transitions and transversions separately. In order to

control for low-frequency ascertainment biases, we excluded segregating sites with a frequency of  $1/N$  within species, where  $N$  is the total number of sequences per species. All calculations were performed using the script *poly+div\_sfs.pl*, available at <https://sites.google.com/site/santiagosnchezrmirez/home/software/perl>. For comparison, estimations were also computed in DnaSP v5 (Librado and Rozas 2009) and Polymorphorama (Bachtrog and Andolfatto 2006, <http://ib.berkeley.edu/labs/bachtrog/data/polyMORPHOrama/polyMORPHOrama.html>).

*McDonald-Kreitman tests.* We estimated the degree of adaptive evolution in CDS for each species by measuring the amount of polymorphism (within species DNA changes) and divergence (fixed DNA changes between species) leading to non-synonymous and synonymous substitutions. We used the McDonald-Kreitman test (MKT) (McDonald and Kreitman 1991) to estimate the Neutrality Index (NI),

$$\frac{p_n/p_s}{d_n/d_s}$$

Where  $p_n$  and  $p_s$  are, respectively, the within-species proportion of non-synonymous and synonymous segregating sites per non-synonymous and synonymous site, and  $d_n$  and  $d_s$ , the proportion of fixed non-synonymous and synonymous substitutions per non-synonymous and synonymous site. Values closer to 1 indicate neutrality, those close to 0 indicate positive selection, and those  $> 1$  suggest either negative purifying selection or balancing selection. We used the formula derived by (Smith and Eyre-Walker 2002) to estimate the proportion of amino acid substitutions under positive selection:

$$\alpha = 1 - \frac{D_s P_n}{D_n P_s}$$

525 This model assumes that mutations are either strongly deleterious or neutral, thus model violations  
526 can arise in the presence of slightly deleterious mutations. Likewise, demographic changes can also  
527 cause  $\alpha$  to be under or overestimated (Eyre-Walker 2006). In order, to account for demography and  
528 slightly deleterious mutations we used the approach by Eyre-Walker and Keightley (2007, 2009),  
529 which uses a maximum likelihood approximation based on the distribution of fitness effects  
530 (Keightley and Eyre-Walker 2010; [http://www.homepages.ed.ac.uk/pkeightl//dfe\\_alpha/dfe-alpha-](http://www.homepages.ed.ac.uk/pkeightl//dfe_alpha/dfe-alpha-download.html)  
531 [download.html](http://www.homepages.ed.ac.uk/pkeightl//dfe_alpha/dfe-alpha-download.html)). Here, estimated the derived SFS for each gene and for each species by polarizing  
532 alleles using the outgroup (*A. basii*). We first used *est\_dfe* on the folded "neutral" and "selected" (e.g.  
533 synonymous and non-synonymous sites) SFS to estimate the DFE based on a two-stage demographic  
534 model fixing the  $N_1$  to 100 and optimizing  $N_2$ . The mean selection coefficient  $s$  and the  $\beta$  parameter  
535 were also optimized using as starting values -0.1 and 0.5 respectively. We then ran *est\_alpha\_omega*  
536 specifying "neutral" and "selected" counts of diverged (fixed) sites. We applied Jukes-Cantor  
537 correction for multiple hits when estimating divergence and removed polymorphism contributing to  
538 divergence. In order to generate confidence intervals, we re-estimated parameters by bootstrapping  
539 100 times 100 randomly sampled SFS. Every time the 100 SFS were summarized for each allelic bin.  
540

541 *Codon-based model selection.* Models that solely rely on  $K_n/K_s$  ( $\omega$ ) ratios are also robust and  
542 popular methods for detecting natural selection at the molecular level (Nielsen 2001; Yang and  
543 Nielsen 2002). Essentially, CDS regions that have an equal number non-synonymous and  
544 synonymous mutations are thought to evolve under effective neutrality, having a  $\omega = 1$ . Deviations  
545 from this ratio indicate purifying selection if  $\omega < 1$  and diversifying (positive) selection if  $\omega > 1$   
546 (Yang 1998; Anisimova et al. 2001). We used likelihood ratio tests (LRT) to discriminate between  
547 three codon-based models: (1) a site-wise model with a single  $\omega$  ratio; (2) a site-wise “nearly neutral”  
548 model where there is a proportion of sites  $p_0$  with  $\omega_0 < 1$ , and a proportion of sites  $p_1$  with  $\omega_1 = 1$ .



549 This serves as a null model for a third that considers an additional category of sites with  $p_2$  with  
550  $\omega_2 > 1$ . In the last two models,  $p_1$  and  $p_2$  are fixed as  $p_1 = 1 - p_0$  and  $p_2 = 1 - p_0 - p_1$ ,  
551 respectively. All models are based on Goldman and Yang's (1994) codon substitution model and  
552 were estimated using maximum likelihood in PAML v4.8a (Yang 2007) using *codeml*. Because  $\omega$   
553 ratios assume that mutations are fixed differences between species and because population  
554 polymorphisms may potentially bias  $\omega$  estimates (Kryazhimskiy and Plotkin 2008), we selected only  
555 one sequence per species per gene.

556

557 *Historical demography.* To infer the demographic history of each species, we applied the multi-locus  
558 eBSP model (Heled and Drummond 2008) using the Kimura-2-parameter (K80) model with gamma  
559 distribution as the substitution model, implemented in BEAST v1.8.2 (Drummond et al. 2012). As  
560 data, we selected 29 intron regions that complied to a series of filters, namely a length size of at least  
561 400 bp and locations in different linkage groups. This last filter was done to ensure that loci are not in  
562 linkage disequilibrium, as the eBSP model assumes free between loci recombination. In each species,  
563 we included an alignment the translation elongation factor 1 alpha (*tef1*), which has been used as  
564 molecular clock proxy with a substitution rate of 0.00194 substitution/site/Myr (Sánchez-Ramírez et  
565 al. 2015b). The substitution rate in the other genes is scaled based on the fixed rate. Each of the eBSP  
566 analyses ran for 100 million generations, with a sampling rate of 10%, and a burnin of 10%. We  
567 assessed convergence and mixing by looking at likelihood per generation trace plots and effective  
568 sample size values in Tracer 1.6 (Rambaut et al. 2013). Population size values in eBSP were  
569 produced directly from the analyses in CSV format.

570

571 *Structural and functional annotations.* Whole-gene sequences from *A. jacksonii* were translated into  
572 amino acids and then imported into Blast2GO (Conesa et al. 2005), which was used as an annotation

573 tool. The main amino acid sequence annotation was taken from the non-redundant (nr) protein  
574 database in NCBI using BLASTp, only keeping the best 10 matches. In addition, we ran  
575 InterProScan v5 (Zdobnov and Apweiler 2001) to identify functional domains, from which we  
576 extracted GO terms. For visualization purposes, we used advanced “word clouds” in  
577 <http://www.wordle.net/advanced>, where scaled GO terms were laid out. Molecular function,  
578 biological processes, and cellular component, were marked by different colors. For the scaling  
579 proportion, we used:

$$\sum_{x=1}^x \sum_{k=1}^k \alpha / x$$

580 where  $\alpha$  is the value of the amount of adaptive evolution ( $\alpha$  or  $P_{\omega}$ ) summed over  $k$  species which  
581 have found  $\alpha > 0$  and summed over  $x$  times a given GO term was found. In the case of  $\alpha$   $k$  and  $x$  can  
582 be minimally 1, however for  $P_{\omega}$ , which is the proportion of sites with  $\omega > 1$ , there is only a single  
583 value per gene (i.e.  $k$  always equals 1), but  $x$  can be  $> 1$ .

584

## 585 **Acknowledgements**

586 We would like to thank Hernán López-Fernández and Katriina Ilves for sharing their experiences  
587 with exon-targeting sequencing, and Dax Torti for providing advice on best library preparation and  
588 sequencing practices. We also acknowledge SciNet and CAGEF for providing access to high-  
589 performance computing infrastructure. Funding was provided through grants to J.M.M. by the Royal  
590 Ontario Museum (ROM) Governors and Natural Science and Engineering Research Council  
591 (NSERC) of Canada, and a scholarship by the National Science and Technology Council of Mexico  
592 (CONACYT) for doctoral studies to S.S.R.

593

## 594 **References**

595 Aguiar D, Istrail S. 2012. HapCompass: a fast cycle basis algorithm for accurate haplotype assembly  
596 of sequence data. *J Comp Biol.* 19:577–590.

597 Aguilar A, Garza JC. 2007. Patterns of historical balancing selection on the salmonid major  
598 histocompatibility complex class II  $\beta$  gene. *J Mol Evol.* 65:34–43.

599 Aguilera G, Marthey S, Chiapello H, Lebrun MH, Rodolphe F, Fournier E, et al. 2008. Assessing the  
600 performance of single-copy genes for recovering robust phylogenies. *Syst Biol.* 57:613–627.

601 Aguilera G, Hood M, Refrégier Ga, Giraud T. 2009. Genome evolution in plant pathogenic and  
602 symbiotic fungi. *Adv Bot Res.* 49:151–193.

603 Aguilera G, Lengelle J, Chiapello H, Giraud T, Viaud M, Fournier E, Rodolphe F, Marthey S,  
604 Ducasse A, Gendault A, Poulain J, Wincker P, Gout L. 2012. Genes under positive selection  
605 in a model plant pathogenic fungus, *Botrytis*. *Infect Genet Evol.* 12:987–996.

606 Aguilera G, Lengelle J, Marthey S, Chiapello H, Rodolphe F, Gendault A, Yockteng R, Vercken E,  
607 Devier B, Fontaine MC, Wincker P, Dossat C, Cruaud C, Couloux A, Giraud T. 2010.  
608 Finding candidate genes under positive selection in non-model species: examples of genes  
609 involved in host specialization in pathogens. *Mol Ecol.* 19:292–306.

610 Anderson JB. 2005. Evolution of antifungal-drug resistance: mechanisms and pathogen fitness. *Nat*  
611 *Rev Microbiol.* 3:547–556.

612 Anderson JB, Kohn LM, Leslie JF. 1992. Genetic mechanisms in fungal adaptation. In: *The fungal*  
613 *community: its organization and role in the ecosystem.* New York: Marcel Dekker. p, 73–98.

614 Anderson JB, Funt J, Thompson DA, Prabhu S, Socha A, Sirjusingh C, Dettman JR, Parreiras L,  
615 Guttman DS, Regev A, Kohn LM. 2010. Determinants of divergent adaptation and  
616 Dobzhansky-Muller interaction in experimental yeast populations. *Cur Biol.* 20:1383–1388.

617 Andolfatto P. 2001. Adaptive hitchhiking effects on genome variability. *Curr Opin Genet Dev.*  
618 11:635–641.

619 Andolfatto P. 2005. Adaptive evolution of non-coding DNA in *Drosophila*. *Nature* 437:1149–1152.

620 Anisimova M, Bielawski JP, Yang Z. 2001. Accuracy and power of the likelihood ratio test in  
621 detecting adaptive molecular evolution. *Mol Biol Evol.* 18:1585–1592.

622 Bachtrog D, Andolfatto P. 2006. Selection, recombination and demographic history in *Drosophila*  
623 *miranda*. *Genetics* 174:2045–2059.

624 Becher R, Hettwer U, Karlovsky P, Deising HB, Wirsal SGR. 2010. Adaptation of *Fusarium*  
625 *graminearum* to tebuconazole yielded descendants diverging for levels of fitness, fungicide  
626 resistance, virulence, and mycotoxin production. *Phytopathology.* 100:444–453.

627 Bell G. 2009. Fluctuating selection: the perpetual renewal of adaptation in variable environments.  
628 *Phil Trans Royal Soc London (B).* 365:87–97.

629 Bentrup KZ, Russell DG. 2001. Mycobacterial persistence: adaptation to a changing environment.  
630 *Trends Microbiol.* 9:597–605.

631 Bierne N, Eyre-Walker A. 2004. The genomic rate of adaptive amino acid substitution in *Drosophila*.  
632 *Mol Biol Evol.* 21:1350–1360.

633 Branco S, Gladieux P, Ellison CE, Kuo A, LaButti K, Lipzen A, Grigoriev IV, Liao HL, Vilgalys R,  
634 Peay KG, Taylor JW, Bruns TD. 2015. Genetic isolation between two recently diverged  
635 populations of a symbiotic fungus. *Mol Ecol.* 24:2747–2758.

636 Campos JL, Halligan DL, Haddrill PR, Charlesworth B. 2014. The Relation between recombination  
637 rate and patterns of molecular evolution and variation in *Drosophila melanogaster*. *Mol Biol*  
638 *Evol.* 31:1010–1028.

639 Charlesworth B. 2009. Fundamental concepts in genetics: effective population size and patterns of  
640 molecular evolution and variation. *Nat Rev Genet.* 10:195–205.

641 Charlesworth B. 2010. Molecular population genomics: a short history. *Genet Res.* 92:397–411.

642 Charlesworth J, Eyre-Walker A. 2006. The rate of adaptive evolution in enteric bacteria. *Mol Biol*  
643 *Evol.* 23:1348–1356.

644 Conesa A, Götz S, García-Gómez JM, Terol J, Talón M, Robles M. 2005. Blast2GO: a universal tool  
645 for annotation, visualization and analysis in functional genomics research. *Bioinformatics.*  
646 21:3674–3676.

647 Cummings MP, Neel MC, Shaw KL. 2008. A genealogical approach to quantifying lineage  
648 divergence. *Evolution.* 62:2411–2422.

649 Cutter AD. 2013. Integrating phylogenetics, phylogeography and population genetics through  
650 genomes and evolutionary theory. *Mol Phylogenet Evol.* 69:1172–1185.

651 Cutter AD, Choi JY. 2010. Natural selection shapes nucleotide polymorphism across the genome of  
652 the nematode *Caenorhabditis briggsae*. *Genome Res.* 20:1103–1111.

653 Cutter AD, Payseur BA. 2013. Genomic signatures of selection at linked sites: unifying the disparity  
654 among species. *Nat Rev Genet.* 14:262–274

655 Cutter AD, Wang G-X, Ai H, Peng Y. 2012. Influence of finite-sites mutation, population  
656 subdivision and sampling schemes on patterns of nucleotide polymorphism for species with  
657 molecular hyperdiversity. *Mol Ecol.* 21:1345–1359.

658 Davies JM, Lowry CV, Davies KJ. 1995. Transient adaptation to oxidative stress in yeast. *Arch*  
659 *Biochem Biophys.* 317:1–6.

660 De Smet R, Adams KL, Vandepoele K, Van Montagu MCE, Maere S, Van de Peer Y. 2013q.  
661 Convergent gene loss following gene and genome duplications creates single-copy families in  
662 flowering plants. *PNAS* 110(8):2898–2903. <http://doi.org/10.1073/pnas.1300127110>

663 Dentinger BTM, Margaritescu S, Moncalvo J-M. 2010. Rapid and reliable high-throughput methods  
664 of DNA extraction for use in barcoding and molecular systematics of mushrooms. *Mol Ecol*  
665 *Res.* 10:628–633.

666 Dettman JR, Anderson JB, Kohn LM. 2010. Genome-wide investigation of reproductive isolation in  
667 experimental lineages and natural species of *Neurospora*: identifying candidate regions by  
668 microarray-based genotyping and mapping. *Evolution* 64:694-709.

669 Drummond AJ, Suchard MA, Xie D, Rambaut A. 2012. Bayesian phylogenetics with BEAUti and the  
670 BEAST 1.7. *Mol Biol Evol.* 29:1969–1973.

671 Edgar RC. 2004. MUSCLE: multiple sequence alignment with high accuracy and high throughput.  
672 *Nucleic Acids Res.* 32:1792–1797.

673 Egea R, Casillas S, Barbadilla A. 2008. Standard and generalized McDonald-Kreitman test: a website  
674 to detect selection by comparing different classes of DNA sites. *Nucleic Acids Res.*  
675 36:W157–W162.

676 Ekblom R, Galindo J. 2011. Application of next generation sequencing in molecular ecology of non-  
677 model organisms. *Heredity.* 107:1–15.

678 Ellegren H. 2014. Genome sequencing and population genomics in non-model organisms. *Trends*  
679 *Ecol Evol.* 29:51–63.

680 Ellison CE, Hall C, Kowbel D, Welch J, Brem RB, Glass NL, Taylor JW. 2011. Population genomics  
681 and local adaptation in wild isolates of a model microbial eukaryote. *Proc Natl Acad Sci*  
682 *USA.* 108:2831–2836.

683 Eyre-Walker A. 2006. The genomic rate of adaptive evolution. *Trends Ecol Evol* 21:569–575.

684 Eyre-Walker A, Keightley PD. 2007. The distribution of fitness effects of new mutations. *Nat Rev*  
685 *Genet.* 8:610–618.

686 Eyre-Walker A, Keightley PD. 2009. Estimating the rate of adaptive molecular evolution in the  
687 presence of slightly deleterious mutations and population size change. *Mol Biol Evol.*  
688 26:2097–2108.

689 Fay JC, Wu CI. 2000. Hitchhiking under positive Darwinian selection. *Genetics* 155:1405–1413.

690 Fay JC, Wu C-I. 2003. Sequence divergence, functional constraint, and selection in protein evolution.  
691 Annu Rev Genom Human Genet. 4:213–235.

692 Fay JC, Wyckoff GJ, Wu CI. 2001. Positive and negative selection on the human genome. Genetics  
693 158:1227–1234.

694 Fisher MC, Henk DA, Briggs CJ, Brownstein JS, Madoff LC, McCraw SL, Gurr SJ. 2012. Emerging  
695 fungal threats to animal, plant and ecosystem health. Nature 484:186–194.

696 Fu YX, Li WH. 1993. Statistical tests of neutrality of mutations. Genetics 133:693–709.

697 Fu YX, Li WH. 1999. Coalescing into the 21st century: An overview and prospects of coalescent  
698 theory. Theor Popul Biol. 56:1–10.

699 Gao X, Gulari E, Zhou X. 2004. In situ synthesis of oligonucleotide microarrays. Biopolymers.  
700 73:579–596.

701 Gerstein AC, Kuzmin A, Otto SP. 2014. Loss-of-heterozygosity facilitates passage through Haldane's  
702 sieve for *Saccharomyces cerevisiae* undergoing adaptation. Nat Comm. 5:3819.

703 Gladieux P, Devier B, Aguileta G, Cruaud C, Giraud T. 2013. Purifying selection after episodes of  
704 recurrent adaptive diversification in fungal pathogens. Infect Genet Evol. 17:123–131.

705 Gladieux P, Ropars J, Badouin H, Branca A, Aguileta G, de Vienne DM, Rodríguez de la Vega RC,  
706 Branco S, Giraud T. 2014. Fungal evolutionary genomics provides insight into the  
707 mechanisms of adaptive divergence in eukaryotes. Mol Ecol. 23:753–773.

708 Goldman N, Yang Z. 1994. A codon-based model of nucleotide substitution for protein-coding DNA  
709 sequences. Mol Biol Evol. 11:725–736.

710 Gossmann TI, Waxman D, Eyre-Walker A. 2014. Fluctuating selection models and McDonald-  
711 Kreitman type analyses. PLoS ONE 9:e84540–5.

712 Han F, Peng Y, Xu L, Xiao P. 2014. Identification, characterization, and utilization of single copy  
713 genes in 29 angiosperm genomes. BMC Genomics 15:504–9.

714 Hancock-Hanser BL, Frey A, Leslie MS, Dutton PH, Archer FI, Morin PA. 2013. Targeted multiplex  
715 next-generation sequencing: advances in techniques of mitochondrial and nuclear DNA  
716 sequencing for population genomics. *Mol Ecol Res.* 13:254–268.

717 Heled J, Drummond AJ. 2008. Bayesian inference of population size history from multiple loci.  
718 *BMC Evol Biol.* 8:289.

719 Heled J, Drummond AJ. 2010. Bayesian inference of species trees from multilocus data. *Mol Biol*  
720 *Evol.* 27:570–580.

721 Hewitt GM. 1996. Some genetic consequences of ice ages, and their role in divergence and  
722 speciation. *Biol J Linn Soc.* 58:247–276.

723 Hewitt G. 2000. The genetic legacy of the Quaternary ice ages. *Nature* 405:907–913.

724 Hewitt GM. 2004. Genetic consequences of climatic oscillations in the Quaternary. *Phil Tran R Soc*  
725 *B.* 359:183–195.

726 Hoffmann AA, Sgrò CM. 2011. Climate change and evolutionary adaptation. *Nature* 470:479–485.

727 Hough J, Williamson RJ, Wright SI. 2013. Patterns of selection in plant genomes. *Ann Rev Ecol*  
728 *Evol Syst.* 44:31–49.

729 Huerta-Sanchez E, Durrett R, Bustamante CD. 2008. Population genetics of polymorphism and  
730 divergence under fluctuating selection. *Genetics* 178:325–337.

731 Hughes AL, Nei M. 1988. Pattern of nucleotide substitution at major histocompatibility complex  
732 class I loci reveals overdominant selection. *Nature* 335:167–170.

733 Kimura M. 1977. Preponderance of synonymous changes as evidence for the neutral theory of  
734 molecular evolution. *Nature* 267:275–276.

735 Kimura M. 1986. DNA and the neutral theory. *Philos. Trans. R. Soc. Lond. B.* 312:343–354.

736 Kohler A, Kuo A, Nagy LG, Morin E, Barry KW, Buscot F, Canbäck B, Choi C, Cichocki N, Clum  
737 A, Colpaert J, Copeland A, Costa MD, Doré J, Floudas D, Gay G, Girlanda M, Henrissat B,



738 Herrmann S, Hess J, Högberg N, Johansson T, Khouja HR, LaButti K, Lahrmann U,  
739 Levasseur A, Lindquist EA, Lipzen A, Marmeisse R, Martino E, Murat C, Ngan CY, Nehls U,  
740 Plett JM, Pringle A, Ohm RA, Perotto S, Peter M, Riley R, Rineau F, Ruytinx J, Salamov A,  
741 Shah F, Sun H, Tarkka M, Tritt A, Veneault-Fourrey C, Zuccaro A, Tunlid A, Grigoriev IV,  
742 Hibbett DS, Martin F. 2015. Convergent losses of decay mechanisms and rapid turnover of  
743 symbiosis genes in mycorrhizal mutualists. *Nat Genet* 47:410–415.

744 Kontoyiannis DP, Lewis RE. 2002. Antifungal drug resistance of pathogenic fungi. *Lancet*  
745 359:1135–1144.

746 Kryazhimskiy S, Plotkin JB. 2008. The population genetics of dN/dS. *PLoS Genet* 4:e1000304.

747 Li H, Durbin R. 2010. Fast and accurate long-read alignment with Burrows-Wheeler transform.  
748 *Bioinformatics* 26:589–595.

749 Li H, Handsaker B, Wysoker A, Fennell T, Ruan J, Homer N, Marth G, Abecasis G, Durbin R, 1000  
750 Genome Project Data Processing Subgroup. 2009. The Sequence Alignment/Map format and  
751 SAMtools. *Bioinformatics* 25:2078–2079.

752 Librado P, Rozas J. 2009. DnaSP v5: a software for comprehensive analysis of DNA polymorphism  
753 data. *Bioinformatics* 25:1451–1452.

754 Liu ZL. 2006. Genomic adaptation of ethanologenic yeast to biomass conversion inhibitors. *Appl*  
755 *Microbiol Biotechnol* 73:27–36.

756 McDonald JH, Kreitman M. 1991. Adaptive protein evolution at the *Adh* locus in *Drosophila*. *Nature*  
757 351:652–654.

758 Messer PW, Petrov DA. 2013a. Frequent adaptation and the McDonald-Kreitman test. *Proc Natl*  
759 *Acad Sci USA*. 110:8615–8620.

760 Messer PW, Petrov DA. 2013b. Population genomics of rapid adaptation by soft selective sweeps.  
761 *Trends Ecol Evol*. 28:659–669.

762 Nehls U, Grunze N, Willmann M, Reich M, Küster H. 2007. Sugar for my honey: carbohydrate  
763 partitioning in ectomycorrhizal symbiosis. *Phytochemistry* 68:82–91.

764 Nei M. 1987. *Molecular Evolutionary Genetics*. Columbia University Press.

765 Nei M., Li W-H. 1979. Mathematical model for studying genetic variation in terms of restriction  
766 endonuclease. *Proc Natl Acad Sci USA*. 89:1477–1481.

767 van der Nest MA, Beirn LA, Crouch JA, Demers JE, de Beer ZW, De Vos L, Gordon TR, Moncalvo  
768 J-M, Naidoo K, Sánchez-Ramírez S, Roodt D, Santana QC, Slinski SL, Stata M, Taerum SJ,  
769 Wilken PM, Wilson AM, Wingfield MJ, Wingfield BD. 2014. IMA Genome-F 3: Draft  
770 genomes of *Amanita jacksonii*, *Ceratocystis albifundus*, *Fusarium circinatum*, *Huntia*  
771 *omanensis*, *Leptographium procerum*, *Rutstroemia sydowniana*, and *Sclerotinia echinophila*.  
772 IMA Fungus. 5:472–485.

773 Nielsen R. 1997. The ratio of replacement to silent divergence and tests of neutrality. *J. Evol. Biol.*  
774 10:217–231.

775 Nielsen R. 2001. Statistical tests of selective neutrality in the age of genomics. *Heredity*.

776 Nielsen R, Williamson S, Kim Y, Hubisz MJ, Clark AG, Bustamante C. 2005. Genomic scans for  
777 selective sweeps using SNP data. *Genome Res*. 15:1566–1575.

778 Ohta T. 1992. The nearly neutral theory of molecular evolution. *Annu Rev Ecol Syst*. 23:263–286.

779 Paradis E, Claude J, Strimmer K. 2004. APE: analyses of phylogenetics and evolution in R language.  
780 *Bioinformatics*. 20:289–290.

781 Piper P, Calderon CO, Hatzixanthos K, Mollapour M. 2001. Weak acid adaptation: the stress response  
782 that confers yeasts with resistance to organic acid food preservatives. *Microbiology*.  
783 147:2635–2642.

784 Rambaut A, Suchard MA, Xie W, Drummond AJ. 2013. Tracer v1.6.  
785 <http://tree.bio.ed.ac.uk/software/tracer/>

786    Ramírez-Soriano A, Ramos-Onsins SE, Rozas J, Calafell F, Navarro A. 2008. Statistical power  
787            analysis of neutrality tests under demographic expansions, contractions and bottlenecks with  
788            recombination. *Genetics*. 179:555–567.

789    Ronquist, F., M. Teslenko, P. van der Mark, D. L. Ayres, A. Darling, S. Hohna, B. Larget, L. Liu, M.  
790            A. Suchard, and J. P. Huelsenbeck. 2012. MrBayes 3.2: Efficient Bayesian phylogenetic  
791            inference and model choice across a large model space. *Syst Biol*. 61:539–542.

792    Sánchez-Ramírez S, Tulloss RE, Amalfi M, Moncalvo JM. 2015a. Palaeotropical origins,  
793            boreotropical distribution and increased rates of diversification in a clade of edible  
794            ectomycorrhizal mushrooms (*Amanita* section *Caesareae*). *J Biogeogr*. 42:351–363.

795    Sánchez-Ramírez S, Tulloss RE, Guzmán-Dávalos L, Cifuentes-Blanco J, Valenzuela R, Estrada-  
796            Torres A. et al. 2015b. In and out of refugia: historical patterns of diversity and demography  
797            in the North American Caesar's mushroom species complex. *Mol Ecol*. 24:5938–5956.

798    Schoustra SE, Debets AJM, Slakhorst M, Hoekstra RF. 2007. Mitotic recombination accelerates  
799            adaptation in the fungus *Aspergillus nidulans*. *PLoS Genet*. 3:e68.

800    Selbmann L, Egidi E, Isola D, Onofri S, Zucconi L, de Hoog GS, Chinaglia S, Testa L, Tosi S,  
801            Balestrazzi A, Lantieri A, Compagno R, Tigini V, Varese GC. 2013. Biodiversity, evolution  
802            and adaptation of fungi in extreme environments. *Plant Biosyst*. 147:237–246.

803    Sella G, Petrov DA, Przeworski M, Andolfatto P. 2009. Pervasive natural selection in the *Drosophila*  
804            genome? *PLoS Genet* 5:e1000495.

805    Slotte T, Foxe JP, Hazzouri KM, Wright SI. 2010. Genome-wide evidence for efficient positive and  
806            purifying selection in *Capsella grandiflora*, a plant species with a large effective population  
807            size. *Mol Biol Evol*. 27:1813–1821.

808    Smith, N. G. C., and A. Eyre-Walker. 2002. Adaptive protein evolution in *Drosophila*. *Nature*  
809            415:1022–1024.

810 Städler T, Haubold B, Merino C, Stephan W, Pfaffelhuber P. 2009. The impact of sampling schemes  
811 on the site frequency spectrum in nonequilibrium subdivided populations. *Genetics*. 182:205–  
812 216.

813 Stajich JE, Hahn MW. 2005. Disentangling the effects of demography and selection in human  
814 history. *Mol Biol Evol*. 22:63–73.

815 Stanke M, Keller O, Gunduz I, Hayes A, Waack S, Morgenstern B. 2006. AUGUSTUS: ab initio  
816 prediction of alternative transcripts. *Nucleic Acids Res*. 34:W435–439.

817 Suchard MA, Rambaut A. 2009. Many-core algorithms for statistical phylogenetics. *Bioinformatics*.  
818 25:1370–1376.

819 Suutari M, Liukkonen K, Laakso S. 1990. Temperature adaptation in yeasts: the role of fatty acids. *J*  
820 *Gen Microbiol*. 136:1469–1474.

821 Tajima F. 1989. Statistical method for testing the neutral mutation hypothesis by DNA  
822 polymorphism. *Genetics*. 123:585–595.

823 Templeton JEL, Brotherton PM, Llamas B, Soubrier J, Haak W, Cooper A, Austin JJ. 2013. DNA  
824 capture and next-generation sequencing can recover whole mitochondrial genomes from  
825 highly degraded samples for human identification. *Investig Genet*. 4:26.

826 Tulloss RE. 2005. *Amanita*-distribution in the Americas, with comparison to eastern and southern  
827 Asia and notes on spore character variation with latitude and ecology. *Mycotaxon*. 93:189–  
828 231.

829 Watterson GA. 1975. On the number of segregating sites in genetical models without recombination.  
830 *Theor Popul Biol*. 7:256–276.

831 Williamson RJ, Josephs EB, Platts AE, Hazzouri KM, Haudry A, Blanchette M, Wright SI. 2014.  
832 Evidence for widespread positive and negative selection in coding and conserved noncoding  
833 regions of *Capsella grandiflora*. *PLoS Genet*. 10:e1004622.

834 Wolfe BE, Tulloss RE, Pringle A. 2012. The irreversible loss of a decomposition pathway marks the  
835 single origin of an ectomycorrhizal symbiosis. *PLoS One*. 7:e39597.

836 Wright SI, Gaut BS. 2005. Molecular population genetics and the search for adaptive evolution in  
837 plants. *Mol Biol Evol*. 22:506–519.

838 Yang Z. 1998. Likelihood ratio tests for detecting positive selection and application to primate  
839 lysozyme evolution. *Mol Biol Evol*. 15:568–573.

840 Yang Z. 2007. PAML 4: Phylogenetic Analysis by Maximum Likelihood. *Mol Biol Evol*. 24:1586–  
841 1591.

842 Yang Z, Nielsen R. 2000. Estimating synonymous and nonsynonymous substitution rates under  
843 realistic evolutionary models. *Mol Biol Evol*. 17:32–43.

844 Yang Z, Nielsen R, Goldman N, Pedersen AM. 2000. Codon-substitution models for heterogeneous  
845 selection pressure at amino acid sites. *Genetics* 155:431–449.

846 Yang Z, Nielsen R. 2002. Codon-substitution models for detecting molecular adaptation at individual  
847 sites along specific lineages. *Mol Biol Evol*. 19:908–917.

848 Yang Z, Wong WSW, Nielsen R. 2005. Bayes empirical bayes inference of amino acid sites under  
849 positive selection. *Mol Biol Evol*. 22:1107–1118.

850 Zdobnov EM, Apweiler R. 2001. InterProScan –an integration platform for the signature-recognition  
851 methods in InterPro. *Bioinformatics*. 17:847–848.

852 Zeng K, Fu Y-X, Shi S, Wu CI. 2006. Statistical tests for detecting positive selection by utilizing  
853 high-frequency variants. *Genetics* 174:1431–1439.

854

# **Figure captions**

856 Figure 1. A, Species distribution maps based on geographic data from Sánchez-Ramírez et al.  
857 (2015b) and MaxEnt (Phillips et al. 2006). B, Species tree showing phylogenetic relationships and

858 divergence times with relation to the outgroup (modified from Sánchez-Ramírez et al. 2015b).

859 Branches show posterior probability support.

860

861 Figure 2. Polymorphism and divergence data for 502 genes. A, box-plots of Tajima's  $D$  separated by  
862 site-classes (non-synonymous, white; synonymous, light grey; introns, dark grey) for the *A. jacksonii*  
863 complex. B, box-plots of the ratios of non-synonymous to synonymous polymorphism and  
864 divergence. C,  $\alpha$  values from the standard MKT test.

865

866 Figure 3. Estimates of (A) the proportion of adaptive substitutions ( $\alpha_{\text{dfe}}$ ) and (B) the rate of adaptive  
867 evolution ( $\omega_a$ ) based on the distribution of fitness effects.

868

869 Figure 4. The proportion of deleterious mutations under four different  $N_e$ s categories based on the  
870 distribution of fitness effects model.

871

872 Figure 5. Demographic trends through time for each species based on the eBSP model. Grey shading  
873 represents 95% posterior confidence intervals (CI). Solid lines represent mean population size values  
874 and dotted lines represent median values.

875

876 Figure 6. Gene Ontology terms *Wordles* for (A) all genes in the data set, (B) genes with  $\alpha > 1$ , and  
877 genes with a significant proportion of sites under diversifying selection. The size of the term is  
878 equivalent to the extent of selection and how often the term was found across genes and species.

879

880

881

882

883

# 884 **Supplementary data**

885 Table S1. GO terms of singleton genes with  $\alpha > 1$ .

886 Table S2. Species, specimen voucher name, and geographic location data for all samples.

887 Figure S1. Variable sites and percentage of missing data plotted against gene length.

888 Figure S2. Sample of 100 genealogies from 502 estimated trees. Terminal colors indicate different  
889 species.

890 Figure S3. Distribution of *gsi* values for all genes and species. Species with higher amounts of  
891 conflict are highlight.

892 Figure S4. Scatterplot of Tajima's *D* in synonymous and non-synonymous sites against the *gsi*. Grey  
893 points highlight reciprocally monophyletic genes.

894 Figure S5. Scatterplot of  $\alpha$  values against the *gsi*.

895 Figure S6. Scatterplot of  $\alpha$  values and synonymous nucleotide diversity against codon usage bias  
896 (CAI).

897

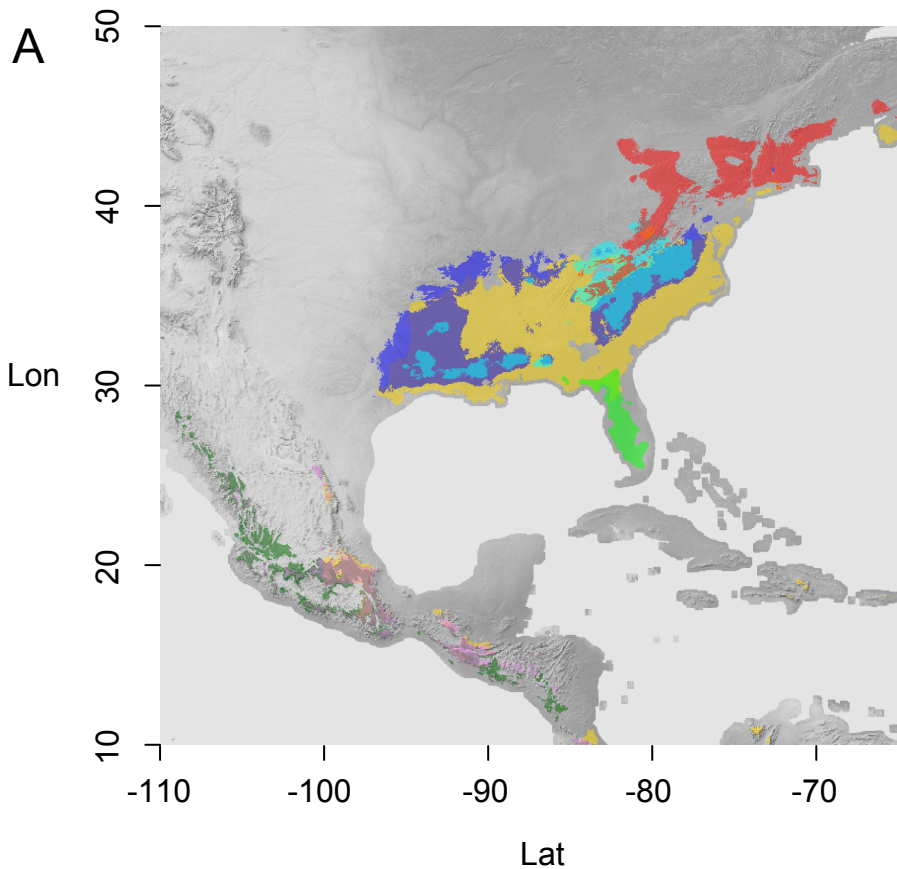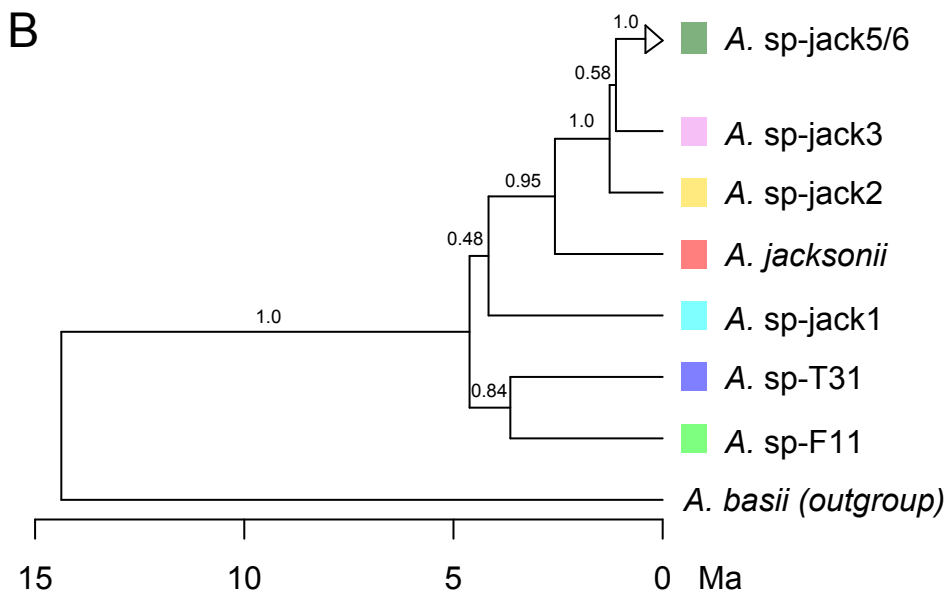



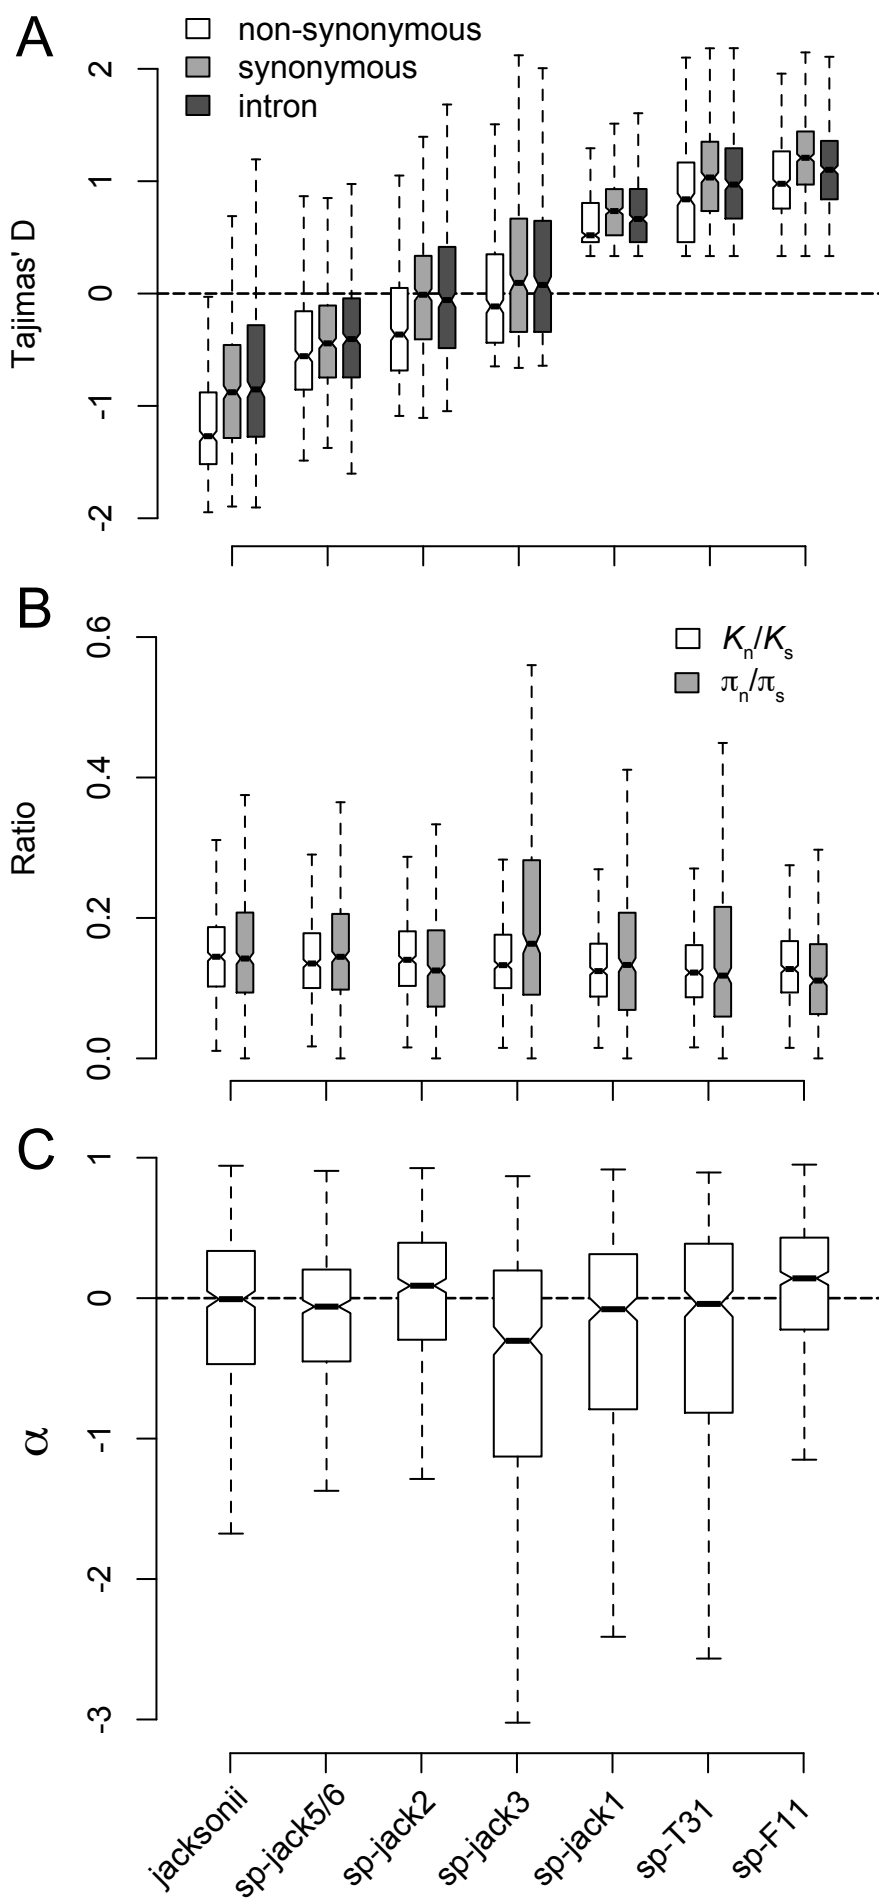

**A** $\alpha_{\text{dfe}}$ 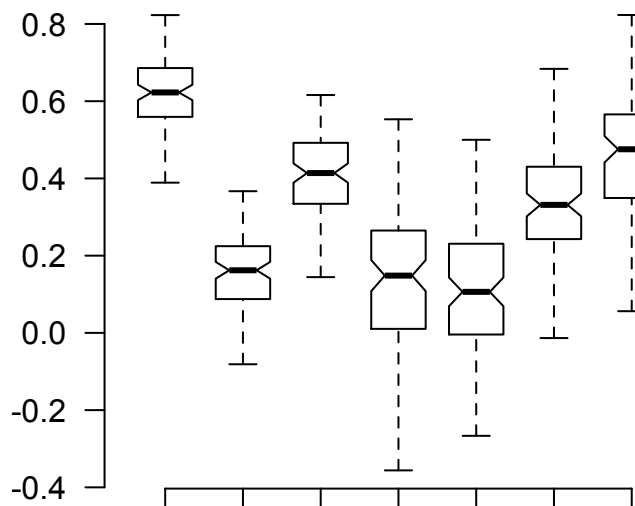**B** $\omega_{\alpha}$ 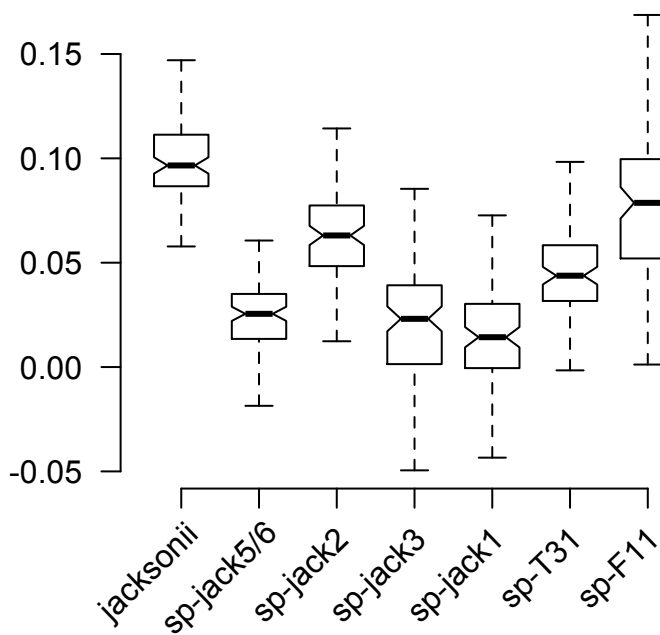

Proportion of mutations

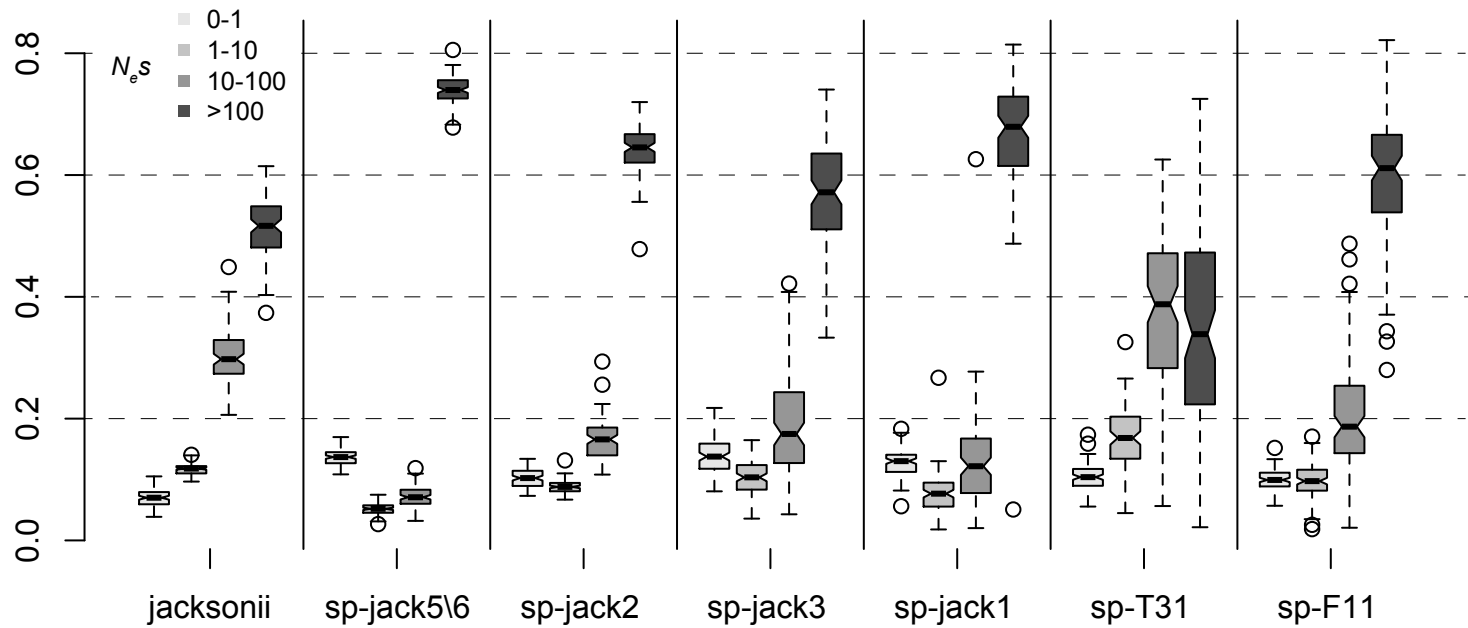

Population size ( $\theta$ )

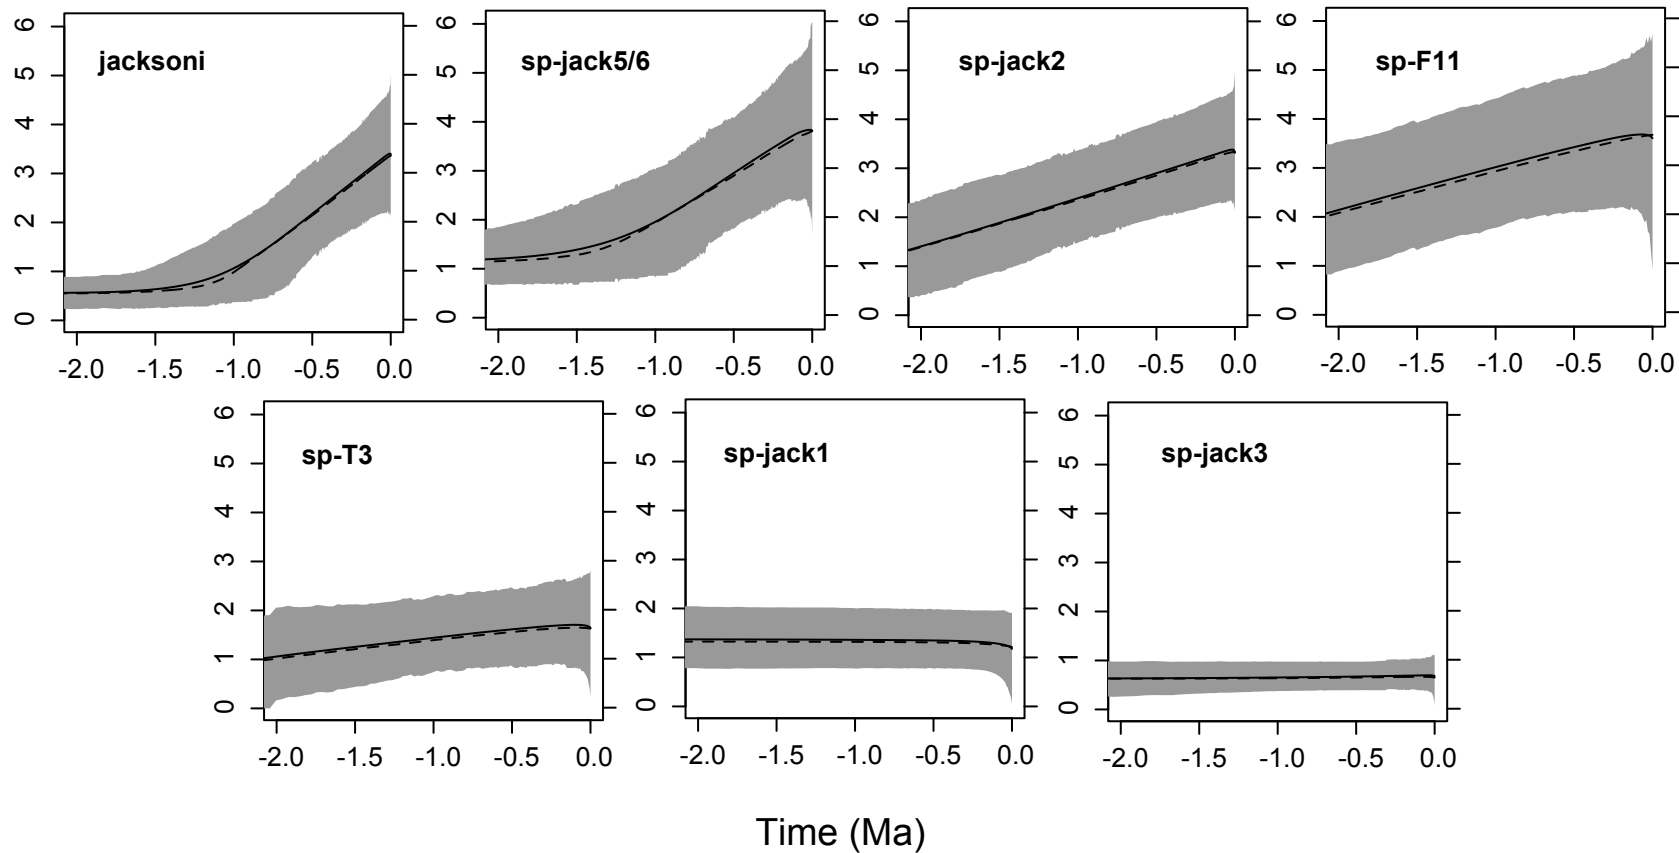

[illegible]

amino acid binding lysine biosynthetic process via diaminopimelate  
telomeric template RNA reverse transcriptase activity  
threonine biosynthetic process  
protein kinase activity  
DNA binding  
aspartate kinase activity  
phosphorylation  
amino acid binding  
small GTPase-mediated signal transduction  
telomeric complex  
sequence-specific DNA binding transcription factor activity  
protein phosphatase activity  
phosphatase activity  
protein binding  
chromatin binding  
small GTPase-mediated signal transduction  
telomeric complex  
sequence-specific DNA binding transcription factor activity  
protein phosphatase activity  
phosphatase activity  
protein binding  
chromatin binding
